# Supplementary material for: Unveiling the stability of Sn/Si/graphite composites for Li-ion storage by physical, electrochemical and computational tools
Source: Royal Society of Chemistry journal article supplement (doi:10.1039/d0cp05501h), 2021-01-01
Supplement: d0cp05501h5.pdf [file d0cp05501h5.pdf]

## Supplementary Information

### Unveiling the stability of Sn/Si/graphite composites for Li-ion storage by physical, electrochemical and computational tools

Andres Ruderman<sup>1,2</sup>, Sacha Smrekar<sup>1,2</sup>, M. Victoria Bracamonte<sup>1,2</sup>, Emiliano N. Primo<sup>1,2</sup>, Guillermina L. Luque<sup>3,4</sup>, Jorge Thomas<sup>5</sup>, Ezequiel Leiva<sup>3,4</sup>, Gustavo A. Monti<sup>1,2</sup>, Daniel E. Barraco<sup>1,2</sup> and Fabián Vaca Chávez<sup>1,2</sup>

1) *Universidad Nacional de Córdoba. Facultad de Matemática, Astronomía, Física y Computación, Córdoba, Argentina.*

2) *CONICET. Instituto de Física Enrique Gaviola (IFEG), Córdoba, Argentina.*

3) *Facultad de Ciencias Químicas, Departamento de Química Teórica y Computacional, Universidad Nacional de Córdoba (UNC). Medina Allende s/n, Ciudad Universitaria, (X5016LAE) Córdoba, Argentina.*

4) *Instituto de Investigación en Físico Química de Córdoba, INFIQC, CONICET. Medina Allende s/n, Ciudad Universitaria, (X5016LAE) Córdoba, Argentina.*

5) *YPF Tecnología S.A., Av. Del Petróleo S/N (e/129 y 143), 1923 Berisso, Buenos Aires, Argentina.*

#### 1. DFT calculations

##### 1.1. Thermodynamical stability and NMR chemical shift calculations

The DFT calculated free energy of formation ( $\Delta G^0$ ) was used to study the Li-Sn alloys stability. For a given structure the energy is calculated as:

$$\Delta G^0 = E_{Li_xSn/Si_y} - xE_{Li_{bulk}} - yE_{Sn/Si_{bulk}}. \quad (1)$$

Where  $E_{Li_{bulk}}$  and  $E_{Sn/Si_{bulk}}$  are the energy per atom in the bulk metals and  $E_{Li_xSn/Si_y}$  is the alloy energy.

Table 1S shows the results of  $\Delta G^0$  corresponding to the different  $Li_xSn_y$  phases. From these values, we can get the equilibrium potential for the formation of the different alloys by setting  $\Delta G^0 = -nFE_0$ , where  $F$  is the Faraday constant and  $n$  is the number of electrons transferred.

To analyze the relative stability of the different alloys at different potentials, it is useful to write the alloying equations per Sn mol:

**Table 1S:** Formation energy calculated for different Li-Sn alloys using Equation 1 and equilibrium potential  $E_0$ .

| Phase                            | $\Delta G^0$ [eV] | $\Delta G^0/n_{Sn}$ [eV] | $E_0$ [V] |
|----------------------------------|-------------------|--------------------------|-----------|
| LiSn                             | -0.72             | -0.72                    | 0.724     |
| Li <sub>7</sub> Sn <sub>3</sub>  | -4.24             | -1.41                    | 0.605     |
| Li <sub>5</sub> Sn <sub>2</sub>  | -2.99             | -1.50                    | 0.598     |
| Li <sub>13</sub> Sn <sub>5</sub> | -7.78             | -1.54                    | 0.597     |
| Li <sub>7</sub> Sn <sub>2</sub>  | -3.60             | -1.80                    | 0.514     |

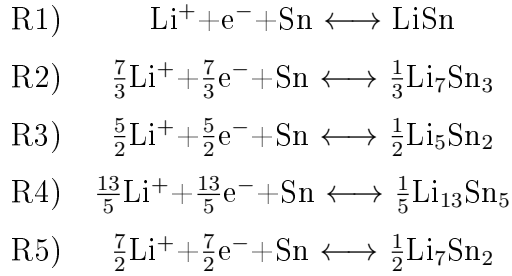

The change of the free energy of each reaction gives the spontaneity criterion for the reaction of a mol of Sn with different amounts  $n_{Li^+}$  of  $\text{Li}^+$  ions in solution, and  $n_e$  electrons in the working electrode. This reaction yields different lithiated species, say  $P_i$ , with the stoichiometric coefficient  $n_i$ . Thus, in general we have:

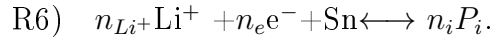

Using this notation, the free energy for any of the reactions R1-R5 can be written as:

$$\Delta G_i = n_i \mu_i - \mu_{Sn} - n_{Li^+} \tilde{\mu}_{Li^+}^S - n_e \tilde{\mu}_e^W, \quad (2)$$

where  $\mu$  and  $\tilde{\mu}$  denote the chemical and electrochemical potentials respectively. Thus,  $\tilde{\mu}_e^W$  represents the electrochemical potential of electrons in the working electrode and  $\tilde{\mu}_{Li^+}^S$  the electrochemical potential of  $\text{Li}^+$  ions in solution. The last two terms are introduced in Equation 2 because electrons and  $\text{Li}^+$  ions may flow into and out of the material being lithiated.

Assuming that the electrode potential is measured with respect to a pure Li reference electrode immersed in the same solution as the working electrode, taking into account that  $n_{Li^+} = n_e$  and subtracting and adding a term  $n_e \mu_{Li^0}$  (with  $\mu_{Li^0}$  representing the chemical

potential of Li atoms in the pure lithium metal), we get:

$$\begin{aligned} \Delta G_i = n_i \mu_i - \mu_{Sn} - n_e \mu_{Li^0} + n_e \tilde{\mu}_e^R + n_{Li^+} \tilde{\mu}_{Li^+}^R \\ - n_{Li^+} \tilde{\mu}_{Li^+}^S - n_e \tilde{\mu}_e^W. \end{aligned} \quad (3)$$

Where we used the fact that for the reference Li electrode  $\mu_{Li^0} = \tilde{\mu}_e^R + \tilde{\mu}_{Li^+}^R$ , been  $\tilde{\mu}_{Li^+}^R$  and  $\tilde{\mu}_{Li^+}^R$  the electrochemical potentials of electrons and core ions in the reference electrode, respectively. Since  $Li^+$  ions are free to flow between the working and the reference electrode, we have  $\tilde{\mu}_{Li^+}^R = \tilde{\mu}_{Li^+}^S$ . Therefore, Equation 3 reduces to:

$$\Delta G_i = n_i \mu_i - \mu_{Sn} - n_e \mu_{Li^0} + n_e (\tilde{\mu}_e^R - \tilde{\mu}_e^W). \quad (4)$$

If we take into account that cell potential  $V_{cell}$  measured with respect to the metallic Li electrode is  $V_{cell} = (\tilde{\mu}_e^R - \tilde{\mu}_e^W)/e_0$ , where  $e_0$  is the elemental charge, we get:

$$\Delta G_i = n_i \mu_i - \mu_{Sn} - n_e \mu_{Li^0} + e_0 n_e V_{cell}. \quad (5)$$

Equation 5 allows us to predict the stability of different alloys arising from the reaction of Li ions with Sn at a given electrode potential, according to reactions R1-R5. The term  $n_i \mu_i - \mu_{Sn} - n_e \mu_{Li^0}$  is equal to  $\Delta G^0$ , calculated previously with DFT, divided by the mols of Sn.

The same procedure was applied to the Li-Si alloys. Table 2S shows the values of  $\Delta G^0$ ,  $\Delta G^0/n_{Si}$  and  $E_0$ .

**Table 2S:** Formation energy calculated for different Li-Si alloys using Equation 1 and equilibrium potential  $E_0$ .

| Phase                            | $\Delta G^0$ [eV] | $\Delta G^0/n_{Si}$ [eV] | $E_0$ [V] |
|----------------------------------|-------------------|--------------------------|-----------|
| LiSi                             | -0.41             | -0.41                    | 0.410     |
| Li <sub>12</sub> Si <sub>7</sub> | -4.62             | -0.66                    | 0.385     |
| Li <sub>7</sub> Si <sub>3</sub>  | -2.57             | -0.86                    | 0.367     |
| Li <sub>13</sub> Si <sub>4</sub> | -4.35             | -1.09                    | 0.334     |
| Li <sub>13</sub> Si <sub>5</sub> | -4.54             | -0.91                    | 0.349     |

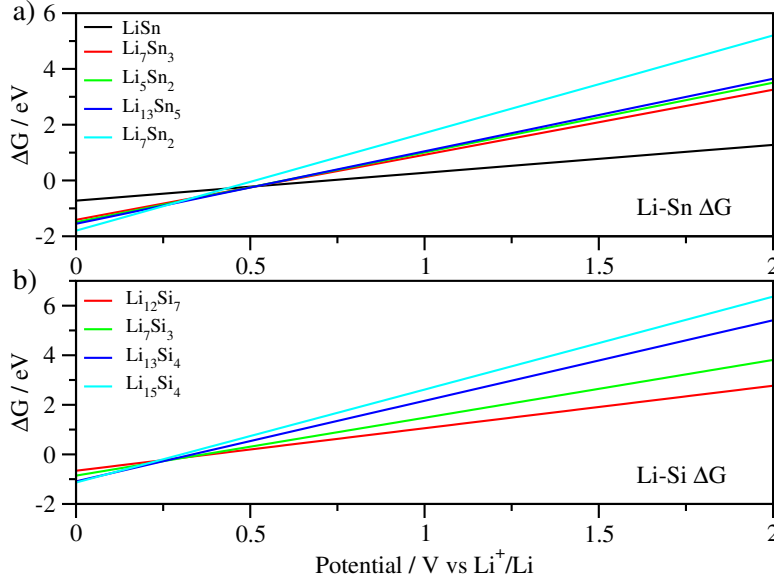

**Figure 1S:** Free energy versus potential ( $\text{Li}^+/\text{Li}$ ) corresponding to Li-Sn and Li-Si alloys.

### 1.2. GIPAW

Figure 2S shows the perfect correlation between the calculation and the experimental data. On one hand, the calculations for LiSn show two resonances known to be related to the crystallographic sites 8e (42.5 ppm) and 4b (32 ppm) [1]. On the other hand, the results of calculations on the  $\text{Li}_{13}\text{Sn}_5$  system also show two resonances. The free fit of the experimental data gives a slope of -0.84 for LiSn and a slope of -0.922 for  $\text{Li}_{13}\text{Sn}_5$ , considering the unknown phase reported by Bekaert *et al* [1]. The proximity to -1 indicates a good correlation between experimental data and calculation.

Table 3S shows the experimental chemical shifts vs the theoretical ones, after the calculation of  $\sigma_{ref}$ . The values of  $\delta_{iso}^{theo}$  coincide, to a good extent, with  $\delta_{iso}^{exp}$ . In particular, the signal observed at  $\delta_{iso}^{exp}=22$  ppm for the  $\text{Li}_{13}\text{Sn}_5$  alloy phase [1] is predicted to occur at  $\delta_{iso}^{theo}=21.8$  ppm. In our experiments the second signal associated to  $\text{Li}_{13}\text{Sn}_5$  in the Sn/ $\mu\text{G}$  2:1 anode is observed at 21 ppm, very close to the predicted value.

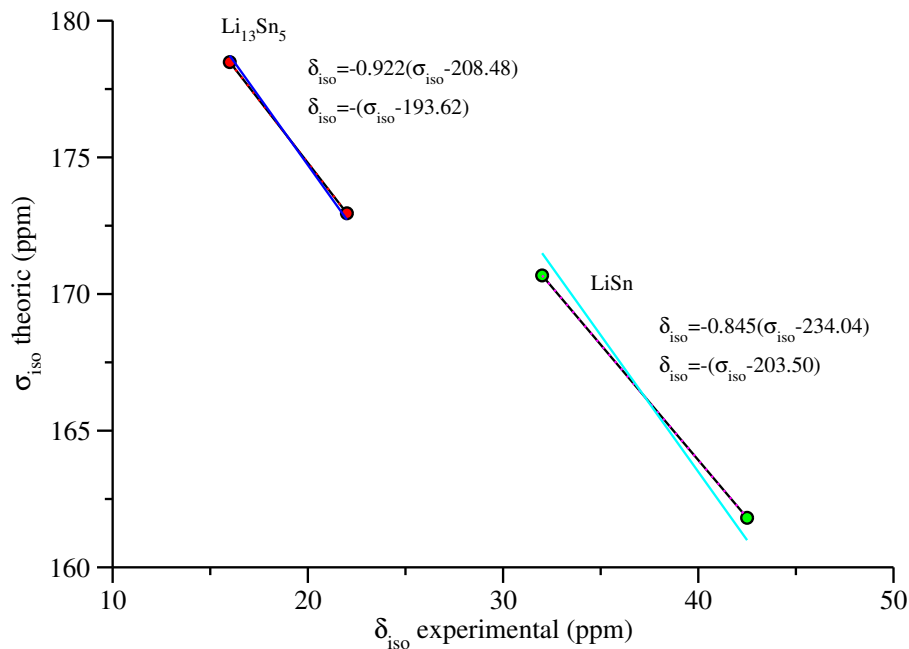

**Figure 2S:** Experimental isotropic chemical shift *vs.* theoretical isotropic chemical shielding calculated for different  $\text{LiSn}$  and  $\text{Li}_{13}\text{Sn}_5$ .

**Table 3S:** Experimental (from ref. [1]) and theoretical chemical shifts of the  $\text{LiSn}$  and  $\text{Li}_{13}\text{Sn}_5$  alloys.

| Alloy                       | Experimental         | Theoretical          |                      |
|-----------------------------|----------------------|----------------------|----------------------|
|                             | $\delta_{iso}$ (ppm) | $\delta_{iso}$ (ppm) | $\sigma_{iso}$ (ppm) |
| $\text{LiSn}$               | 32                   | 32.8                 | 170.7                |
|                             | 42.5                 | 41.7                 | 161.8                |
| $\text{Li}_{13}\text{Sn}_5$ | 16.0                 | 16.2                 | 178.5                |
|                             | 22                   | 21.8                 | 173.0                |

[1] E. Bekaert, F. Robert, P. E. Lippens and M. Ménétrier, *J. Phys. Chem. C*, 2010, **114**, 6749–6754.

**Table 4S:** Theoretical capacity,  $Q_T$ , C-rate for the prepared anodes.

| Anode                      | $Q_T$ (mAhg <sup>-1</sup> ) | C-rate |
|----------------------------|-----------------------------|--------|
| $\mu\text{G}$              | 372                         | C/4    |
| Si/ $\mu\text{G}$ 2:1      | 2484                        | C/25   |
| Sn/ $\mu\text{G}$ 2:1      | 781                         | C/8    |
| Sn/Si/ $\mu\text{G}$ 1:1:1 | 1633                        | C/16   |

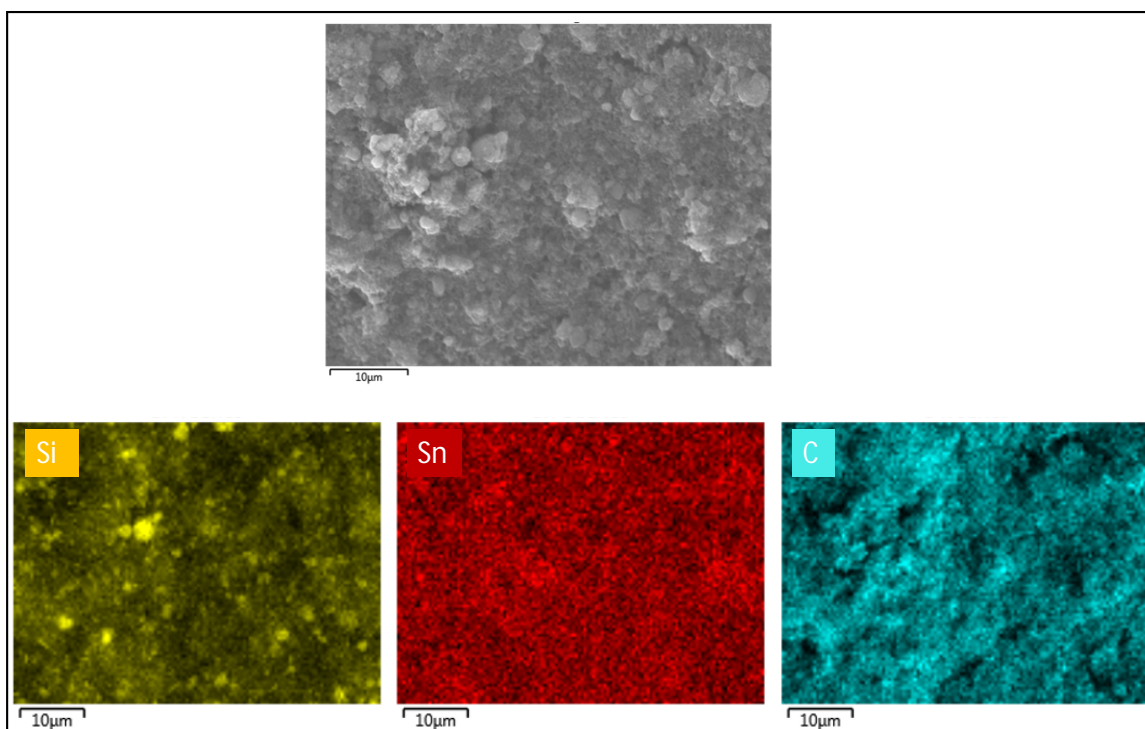

**Figure 3S:** SEM image and EDX analysis for the synthesized Sn/Si/ $\mu\text{G}$  powder.
